# Supplementary material
Source: publisher figshare collection journal article supplement (https://tandf.figshare.com/ndownloader/files/17337800)
Supplement: Supplementary file 1 [file 17337800]

Supplementary Table 5. Effects of bentonite addition and *A*. *sessilis* cultivation on residual PCBi concentrations (ng g-1) in the soil containing 400 ng ƩPCBi g-1 after 13 weeks of incubation.

| PCBi | without plant cultivation | | | With alternanthra cultivation | | |
| --- | --- | --- | --- | --- | --- | --- |
| **B0* (Control)** | **B2** | **B4** | **B0** | **B2** | **B4** |
| CB5 | 4.53 a | 4.26 a | 4.14 a | 3.03 b | 1.87 c | 0.90 d |
| CB18 | 4.17 a | 4.65 a | 4.28 a | 3.73 b | 3.61 b | 2.96 c |
| CB31 | 11.4ab | 10.9ab | 11.7 a | 10.7ab | 9.95b | 6.26 c |
| CB44 | 8.12 a | 7.76 a | 7.84 a | 6.89 b | 5.68 c | 3.39 d |
| CB52 | 2.77 a | 2.59 a | 2.69 a | 2.35 a | 1.64 b | 0.99 c |
| CB66 | 10.8 a | 11.41 a | 10.6 a | 9.44 ab | 9.96 a | 8.10 b |
| CB87 | 38.5 a | 37.8 a | 37.1 a | 27.5 b | 20.7 c | 16.3 d |
| CB101 | 6.70 a | 7.93 a | 6.11 a | 6.80 a | 3.29 b | 1.90 c |
| CB110 | 20.4 a | 19.0 a | 19.7 a | 15.9 b | 13.7 c | 9.62 d |
| CB138 | 16.2 a | 16.7 a | 15.8 a | 16.2 a | 12.2 b | 9.49 c |
| CB141 | 73.3 a | 72.8 a | 74.6 a | 44.2 b | 33.9 c | 23.3 d |
| CB151 | 13.3 a | 14.1 a | 13.1 a | 12.8 a | 10.2 b | 5.02 c |
| CB153 | 18.5 a | 18.0 a | 17.9 a | 17.6 a | 13.4 b | 10.2 c |
| CB170 | 18.9 a | 19.5 a | 18.2 a | 13.4 b | 12.5 b | 9.12 c |
| CB180 | 11.7 a | 11.5 a | 11.7 a | 12.5 a | 9.15 c | 5.26 d |
| CB183 | 48.5 a | 47.8 a | 48.3 a | 38.5 b | 29.2 c | 21.6 d |
| CB187 | 27.7 a | 27.7 a | 27.7 a | 24.2 b | 20.2 c | 12.5 d |

Different letters in each row represent signiﬁcant differences with Tukey test (P< 0.05).

*: B0: 0% bentonite, B2: 2% bentonite, B4: 4% bentonite
